# Supplementary material for: Effects of Chalcogen Atoms on Excited-State Double-Proton Transfer Behavior for 3,6-bis(4,5-Dihydroxyoxazo-2-yl)benzene-1,2-diol Derivatives: A Computational Investigation
Source: MDPI journal article supplement (doi:10.3390/molecules29020461), 2024-01-17
Supplement: s1 [file s1]

## Supporting Information

# Effects of chalcogen atoms on excited state double proton transfer behavior for 3,6-bis(4,5-dihydroxyoxazo-2-yl)benzene-1,2-diol derivatives: A computational investigation

Dapeng Yang <sup>1</sup>, Chang Liu <sup>2</sup>, Meiyi Zhang <sup>2</sup>, Jinfeng Zhao <sup>2,3\*</sup>

<sup>1</sup>. College of Electronics and Engineering, North China University of Water Resources and Electric Power, Zhengzhou 450046, PR China.

<sup>2</sup>. College of Physical Science and Technology, Shenyang Normal University, Shenyang 110034, PR China.

<sup>3</sup>. Institute of Molecular Sciences and Engineering, Institute of Frontier and Interdisciplinary Science, Shandong University, Qingdao, China.

*\*To whom correspondence should be addressed*

E-mail Address: [jfzhao1990112@synu.edu.cn](mailto:jfzhao1990112@synu.edu.cn); [jfzhao1990112@163.com](mailto:jfzhao1990112@163.com) (J. Zhao)

**Table S1.** The ELF parameters and CVB index involved in hydrogen bond O1-H2···N3 or O4-H5···N6 for BDYBD-O, BDYBD-S and BDYBD-Se in S<sub>0</sub> and S<sub>1</sub> states. CVB index = ELF(C-V,D) - ELF(DH-A).

|            | BDYBD-O        |                | BDYBD-S        |                | BDYBD-Se       |                |
|------------|----------------|----------------|----------------|----------------|----------------|----------------|
| States     | S <sub>0</sub> | S <sub>1</sub> | S <sub>0</sub> | S <sub>1</sub> | S <sub>0</sub> | S <sub>1</sub> |
| ELF(C-V,D) | 0.1026         | 0.1050         | 0.1035         | 0.1071         | 0.1036         | 0.1073         |
| ELF(DH-A)  | 0.2183         | 0.3288         | 0.2369         | 0.3849         | 0.2373         | 0.3899         |
| CVB index  | -0.1157        | -0.2238        | -0.1334        | -0.2778        | -0.1337        | -0.2826        |

**Table S2.** The calculated Mulliken charge and NPA charge of O1, H2, N3, O4, H5 and N6 atoms for BDYBD-O, BDYBD-S and BDYBD-Se in both  $S_0$  and  $S_1$  states.

|          |       | Mulliken charge |        | NPA charge |        |
|----------|-------|-----------------|--------|------------|--------|
|          | atoms | $S_0$           | $S_1$  | $S_0$      | $S_1$  |
| BDYBD-O  | O1    | -0.288          | -0.285 | -0.658     | -0.656 |
|          | H2    | 0.295           | 0.290  | 0.504      | 0.497  |
|          | N3    | -0.222          | -0.229 | -0.526     | -0.528 |
|          | O4    | -0.288          | -0.285 | -0.658     | -0.656 |
|          | H5    | 0.295           | 0.290  | 0.504      | 0.497  |
|          | N6    | -0.222          | -0.229 | -0.526     | -0.528 |
| BDYBD-S  | O1    | -0.290          | -0.283 | -0.655     | -0.653 |
|          | H2    | 0.300           | 0.294  | 0.502      | 0.490  |
|          | N3    | -0.176          | -0.184 | -0.482     | -0.491 |
|          | O4    | -0.290          | -0.283 | -0.655     | -0.653 |
|          | H5    | 0.300           | 0.294  | 0.502      | 0.490  |
|          | N6    | -0.176          | -0.184 | -0.482     | -0.491 |
| BDYBD-Se | O1    | -0.291          | -0.283 | -0.654     | -0.652 |
|          | H2    | 0.301           | 0.294  | 0.501      | 0.490  |
|          | N3    | -0.185          | -0.192 | -0.484     | -0.494 |
|          | O4    | -0.291          | -0.283 | -0.654     | -0.652 |
|          | H5    | 0.301           | 0.294  | 0.501      | 0.490  |
|          | N6    | -0.185          | -0.192 | -0.484     | -0.494 |

**Table S3.** The stepwise potential barriers (kcal/mol) in  $S_1$  state along with I  $\rightarrow$  III, I  $\rightarrow$  II and II  $\rightarrow$  III paths for BDYBD-O, BDYBD-S and BDYBD-Se compounds using Cam-B3LYP functional.

|                      | BDYBD-O | BDYBD-S | BDYBD-Se |
|----------------------|---------|---------|----------|
| I $\rightarrow$ III  | 2.9548  | 2.6949  | 2.0541   |
| I $\rightarrow$ II   | 1.6059  | 1.2473  | 1.1110   |
| II $\rightarrow$ III | 2.6872  | 2.4912  | 2.1017   |

### The coordinates of the searched TS forms in S<sub>1</sub> state

BDYBD-O (TS1):

|   | X           | Y           | Z           |
|---|-------------|-------------|-------------|
| C | 0.72980900  | -1.48773700 | 0.00363500  |
| C | -0.67916800 | -1.51523400 | 0.01179100  |
| C | -1.43152000 | -0.34823100 | 0.03227900  |
| C | -0.72428600 | 0.92533600  | -0.01494100 |
| C | 0.69253100  | 0.94191400  | 0.02085300  |
| C | 1.44582700  | -0.29469500 | -0.01298500 |
| H | 1.27225100  | -2.42325900 | -0.00419700 |
| H | -1.18574200 | -2.47117600 | 0.02268600  |
| C | 2.87363700  | -0.23858400 | 0.00061900  |
| O | 3.59029600  | -1.39822300 | 0.07079900  |
| C | 4.97425800  | 0.51447500  | 0.08907700  |
| C | 4.98136700  | -1.01164100 | -0.12841500 |
| H | 5.33826200  | 0.78850800  | 1.08513400  |
| H | 5.58940500  | -1.56324500 | 0.58470300  |
| C | -2.85101700 | -0.30188700 | 0.03200600  |
| O | -3.60966000 | -1.42114700 | -0.08997200 |
| C | -4.92840300 | 0.54287200  | -0.12083500 |
| C | -4.99066000 | -0.98096300 | 0.09535100  |
| H | -5.20849200 | 0.82161100  | -1.14309900 |
| H | -5.60976900 | -1.51123900 | -0.62366400 |
| N | 3.55996400  | 0.86807100  | -0.04649100 |
| N | -3.51656800 | 0.83137700  | 0.12467800  |
| H | 5.58520000  | 1.03887700  | -0.64643600 |
| H | 5.26389800  | -1.28497700 | -1.14685800 |
| H | -5.57457200 | 1.08409500  | 0.56998400  |
| H | -5.29134300 | -1.24072600 | 1.11198800  |
| O | 1.31533200  | 2.11454400  | 0.03194400  |
| H | 2.32253400  | 1.92385900  | 0.01123900  |
| O | -1.40159100 | 2.04530800  | -0.06528000 |
| H | -2.51466900 | 1.74393600  | 0.00067100  |

BDYBD-O (TS2):

|   | X           | Y           | Z           |
|---|-------------|-------------|-------------|
| C | -0.71964400 | -1.45552000 | 0.00978700  |
| C | 0.68040800  | -1.50116100 | 0.00928700  |
| C | 1.42915100  | -0.32724000 | 0.00568400  |
| C | 0.75127700  | 0.96030100  | 0.03231100  |
| C | -0.70022500 | 1.02771500  | -0.02533500 |

|   |             |             |             |
|---|-------------|-------------|-------------|
| C | -1.42588400 | -0.24535900 | 0.02202500  |
| H | -1.27108200 | -2.38637000 | 0.03123000  |
| H | 1.18389100  | -2.45846500 | 0.00565700  |
| C | -2.83656800 | -0.24601800 | 0.04374100  |
| O | -3.55491900 | -1.38184000 | -0.11217700 |
| C | -5.00881900 | 0.46980200  | -0.15468900 |
| C | -4.96004200 | -1.04251400 | 0.08057000  |
| H | -5.20866200 | 0.71498400  | -1.20330500 |
| H | -5.54433100 | -1.62446500 | -0.62640200 |
| C | 2.85171500  | -0.30953700 | 0.01254400  |
| O | 3.59733400  | -1.42785000 | -0.09891500 |
| C | 4.94646800  | 0.52554200  | -0.10155100 |
| C | 4.98974200  | -1.00649100 | 0.06965400  |
| H | 5.56158300  | 1.04037800  | 0.63556500  |
| H | 5.30552900  | -1.30393300 | 1.07013400  |
| N | -3.64353900 | 0.81978800  | 0.22607600  |
| N | 3.52602300  | 0.81033100  | 0.09343500  |
| H | -5.74153700 | 0.96738800  | 0.47771200  |
| H | -5.23388100 | -1.30467200 | 1.10407600  |
| H | 5.26585500  | 0.83964300  | -1.09967700 |
| H | 5.58516000  | -1.52231500 | -0.67884100 |
| O | -1.30436200 | 2.13812500  | -0.10034900 |
| H | -3.19998500 | 1.73095800  | 0.10062500  |
| O | 1.45030900  | 2.05827400  | 0.04394000  |
| H | 2.62771100  | 1.70524700  | 0.06248900  |

BDYBD-S (TS1):

|   | X           | Y           | Z           |
|---|-------------|-------------|-------------|
| C | 0.68716200  | -1.34318000 | 0.04732200  |
| C | -0.72269100 | -1.32434100 | 0.05205600  |
| C | -1.45361800 | -0.14389600 | 0.00505600  |
| C | -0.69998200 | 1.09197600  | 0.00714800  |
| C | 0.72141600  | 1.08017900  | -0.02994800 |
| C | 1.44274900  | -0.18076800 | 0.01993500  |
| H | 1.18458100  | -2.30357000 | 0.09444500  |
| H | -1.24310100 | -2.27262000 | 0.08727200  |
| C | 2.87366400  | -0.14076800 | 0.01451300  |
| C | 4.93958000  | 0.91012300  | -0.11090700 |
| C | 5.37329900  | -0.50268300 | 0.30302800  |
| H | 5.46926400  | 1.66661900  | 0.46975500  |
| H | 5.53845400  | -0.57694700 | 1.37707100  |
| C | -2.88948600 | -0.09502100 | -0.00535700 |
| C | -4.97454400 | 0.89126500  | -0.11700300 |

|   |             |             |             |
|---|-------------|-------------|-------------|
| C | -5.37665900 | -0.52808000 | 0.30948600  |
| H | -5.22791100 | 1.05741600  | -1.17212000 |
| H | -6.25599500 | -0.89322800 | -0.21589800 |
| N | 3.50731900  | 1.01270500  | 0.10710800  |
| N | -3.53862600 | 1.03635200  | 0.05603300  |
| H | 5.16538500  | 1.08094700  | -1.17194000 |
| H | 6.25589500  | -0.84723300 | -0.23038500 |
| H | -5.50547600 | 1.64044000  | 0.47226900  |
| H | -5.53506800 | -0.59850300 | 1.38493200  |
| O | 1.37702000  | 2.21241200  | -0.08999000 |
| H | 2.46786800  | 1.92634100  | -0.01740000 |
| O | -1.31630000 | 2.26284600  | 0.00175800  |
| H | -2.33175900 | 2.05975000  | 0.01918400  |
| S | 3.93255300  | -1.57718800 | -0.14319200 |
| S | -3.91843300 | -1.57117000 | -0.13838800 |

BDYBD-S (TS2):

|   | X           | Y           | Z           |
|---|-------------|-------------|-------------|
| C | 0.69029600  | -1.33783100 | 0.11786700  |
| C | -0.70983800 | -1.30036400 | 0.12131600  |
| C | -1.43505600 | -0.10796600 | 0.03474800  |
| C | -0.71496500 | 1.16293400  | -0.05570800 |
| C | 0.74177800  | 1.10861600  | 0.00491200  |
| C | 1.43746900  | -0.16623000 | 0.04134800  |
| H | 1.18680800  | -2.29704800 | 0.18814900  |
| H | -1.24070800 | -2.23741400 | 0.23732400  |
| C | 2.86929300  | -0.14656500 | 0.02426700  |
| C | 4.94251000  | 0.90378200  | -0.16406100 |
| C | 5.37899800  | -0.50303700 | 0.26346200  |
| H | 5.46511400  | 1.66904700  | 0.40986500  |
| H | 5.58063400  | -0.55772000 | 1.33203700  |
| C | -2.85981000 | -0.11917400 | 0.05896900  |
| C | -5.01379500 | 0.86845700  | -0.04680700 |
| C | -5.37609300 | -0.58495100 | 0.24481800  |
| H | -5.17358700 | 1.10210900  | -1.10653700 |
| H | -6.22813100 | -0.93255200 | -0.33305400 |
| N | 3.50766000  | 0.99601200  | 0.05789800  |
| N | -3.60390700 | 0.98453500  | 0.29680400  |
| H | 5.15412900  | 1.07028100  | -1.22656100 |
| H | 6.24041600  | -0.86341200 | -0.29300000 |
| H | -5.60751100 | 1.55472100  | 0.55678100  |
| H | -5.55121600 | -0.75319300 | 1.30622000  |
| O | 1.41864700  | 2.21678000  | -0.03819000 |

|   |             |             |             |
|---|-------------|-------------|-------------|
| H | 2.58318400  | 1.87371600  | -0.00185300 |
| O | -1.31062200 | 2.27453900  | -0.17041600 |
| H | -3.07829800 | 1.86280600  | 0.19870500  |
| S | 3.91973400  | -1.58387600 | -0.10781000 |
| S | -3.87136000 | -1.53810800 | -0.26424800 |

BDYBD-Se (TS1):

|    | X           | Y           | Z           |
|----|-------------|-------------|-------------|
| C  | 0.68558800  | -1.00170100 | 0.09586100  |
| C  | -0.72394600 | -0.98252700 | 0.10092500  |
| C  | -1.45690300 | 0.19490800  | 0.02469600  |
| C  | -0.70183700 | 1.43014800  | 0.00167300  |
| C  | 0.71989700  | 1.41754300  | -0.03642900 |
| C  | 1.44319700  | 0.15816600  | 0.04165400  |
| H  | 1.18109100  | -1.96174900 | 0.16802300  |
| H  | -1.24269600 | -1.93078600 | 0.15939100  |
| C  | 2.87416600  | 0.19734500  | 0.03325400  |
| C  | 4.93862400  | 1.29728000  | -0.11818900 |
| C  | 5.47432400  | -0.05301600 | 0.37061600  |
| H  | 5.42594200  | 2.11757700  | 0.41202700  |
| H  | 5.61109500  | -0.07429800 | 1.44982000  |
| C  | -2.89265400 | 0.24283900  | 0.01138800  |
| C  | -4.97851700 | 1.27624300  | -0.12904600 |
| C  | -5.48250600 | -0.08198700 | 0.37472500  |
| H  | -5.21775600 | 1.39293100  | -1.19430700 |
| H  | -6.40028800 | -0.39554900 | -0.11646600 |
| N  | 3.50482100  | 1.35150500  | 0.09734600  |
| N  | -3.53997900 | 1.37261600  | 0.04211700  |
| H  | 5.15238100  | 1.41904000  | -1.18878500 |
| H  | 6.39424400  | -0.34523500 | -0.12929600 |
| H  | -5.47045000 | 2.08969800  | 0.40773100  |
| H  | -5.61348600 | -0.09662000 | 1.45486200  |
| O  | 1.37427000  | 2.54855300  | -0.12023200 |
| H  | 2.46443900  | 2.26201100  | -0.04214300 |
| O  | -1.31689600 | 2.60120700  | -0.02821300 |
| H  | -2.33145000 | 2.39782000  | -0.00963400 |
| Se | 4.03832600  | -1.34931800 | -0.08769400 |
| Se | -4.02546000 | -1.34813000 | -0.08250200 |

BDYBD-Se (TS2):

| X | Y | Z |
|---|---|---|
|---|---|---|

|    |             |             |             |
|----|-------------|-------------|-------------|
| C  | -0.71251100 | -0.95456100 | 0.23530600  |
| C  | 0.68608700  | -0.99072600 | 0.19874400  |
| C  | 1.43269000  | 0.17709400  | 0.07042200  |
| C  | 0.73179900  | 1.44459100  | -0.03642900 |
| C  | -0.72515800 | 1.50274200  | 0.00899100  |
| C  | -1.44554000 | 0.22916400  | 0.10092000  |
| H  | -1.23771200 | -1.88886700 | 0.39433000  |
| H  | 1.18489100  | -1.94470900 | 0.31376200  |
| C  | -2.86880400 | 0.21054400  | 0.12534500  |
| C  | -5.02804500 | 1.23922200  | -0.02490300 |
| C  | -5.49720500 | -0.17036900 | 0.31460200  |
| H  | -5.16316700 | 1.43958400  | -1.09525300 |
| H  | -6.37548100 | -0.46830800 | -0.25098800 |
| C  | 2.86308100  | 0.19607600  | 0.02102600  |
| C  | 4.93096200  | 1.28620900  | -0.26444700 |
| C  | 5.47618200  | -0.03112300 | 0.29428700  |
| H  | 5.41280800  | 2.13899600  | 0.21560400  |
| H  | 5.65160600  | 0.01883400  | 1.36667800  |
| N  | -3.61845700 | 1.31396200  | 0.32925600  |
| N  | 3.49642200  | 1.33831800  | -0.03567700 |
| H  | -5.58838000 | 1.98506400  | 0.54001000  |
| H  | -5.67027400 | -0.30125300 | 1.38035900  |
| H  | 5.12264600  | 1.35333500  | -1.34194800 |
| H  | 6.37651900  | -0.36090500 | -0.21715700 |
| O  | -1.32319700 | 2.61649400  | -0.05429500 |
| H  | -3.08330000 | 2.18987000  | 0.25995500  |
| O  | 1.40206700  | 2.54800600  | -0.18664700 |
| H  | 2.56554400  | 2.20789000  | -0.14619600 |
| Se | -3.96479000 | -1.32658100 | -0.20853200 |
| Se | 4.02262400  | -1.35238000 | -0.02116900 |
